# Supplementary material for: Health workforce remuneration: comparing wage levels, ranking, and dispersion of 16 occupational groups in 20 countries
Source: Hum Resour Health. 2013 Feb 28;11:11. doi: 10.1186/1478-4491-11-11 (PMC3787851; doi:10.1186/1478-4491-11-11)
Supplement: Additional file 2 — Mapping the selected WageIndicator occupations into the 16 HRH occupations and their ISCO-08 codes (MS Excel). [file 1478-4491-11-11-S2.xlsx]

## Sheet: Sheet1
isco0813 code	isco0813 label	HRH code	HRH label
1212020000000	Personnel department manager	19	Health Care Administration & Operations
1219030000000	Laboratory department manager	18	Health Care Managers
1219060000000	Administrative services manager	19	Health Care Administration & Operations
1222040000000	Public relations department manager	19	Health Care Administration & Operations
1341010000000	Child care services manager	18	Health Care Managers
1342020000000	Hospital manager	18	Health Care Managers
1342030000000	Handicapped care services manager	18	Health Care Managers
1342040000000	Psychiatric care services manager	18	Health Care Managers
1342990000000	Manager, all other health services	18	Health Care Managers
1343010000000	Aged care services manager	18	Health Care Managers
1344010000000	Social welfare centre manager	18	Health Care Managers
2113030000000	Pharmaceutical chemist	11	Other Health Professionals
2113060000000	Quality inspector pharmaceutical products	12	Medical and Pharmaceutical Technicians
2114990000000	Physical scientists, all other	17	Health Researchers & Educators
2120040000000	Demographer	17	Health Researchers & Educators
2131030000000	Biotechnologist	17	Health Researchers & Educators
2131050000000	Biologist	17	Health Researchers & Educators
2131050127600	DEU Biologist Botaniker	11	Other Health Professionals
2131050227600	DEU Biologist Zoologe	11	Other Health Professionals
2131060000000	Bacteriologist	17	Health Researchers & Educators
2131070000000	Pharmacologist	11	Other Health Professionals
2211010000000	General Practitioner	1	Medical Doctors
2211040000000	Company doctor	1	Medical Doctors
2211050000000	Osteopath	15	Other Health Associate Professionals
2212010000000	Anaesthetist	1	Medical Doctors
2212020000000	Gynaecologist	1	Medical Doctors
2212030000000	Psychiatrist	1	Medical Doctors
2212040000000	Surgeon	1	Medical Doctors
2212050000000	Urologist	1	Medical Doctors
2212060000000	Pathologist	1	Medical Doctors
2212080000000	Gastroenterologist	1	Medical Doctors
2212090000000	Geneticist	1	Medical Doctors
2212100203000	CZE SVK Geriatrist	1	Medical Doctors
2212120020300	CZE SVK Hematologist	1	Medical Doctors
2212130000000	Hygienist, health officer	8	Environm. and Occup. Health and Hyg. Prof.
2212140020300	CZE SVK Immunologist, Allergologist	1	Medical Doctors
2212150020300	CZE SVK Infectologist	1	Medical Doctors
2212160020300	CZE SVK Internal specialist	1	Medical Doctors
2212160036000	IDN Internal specialist	1	Medical Doctors
2212170000000	Cardiologist	1	Medical Doctors
2212180000000	Skin specialist	1	Medical Doctors
2212200203000	CZE SVK Neonatologist	1	Medical Doctors
2212210020300	CZE SVK Neurologist	1	Medical Doctors
2212210036000	IDN Neurologist	1	Medical Doctors
2212220000000	Optical specialist	1	Medical Doctors
2212230020300	CZE SVK Specialist in nuclear medicine	1	Medical Doctors
2212230036000	IDN Specialist in nuclear medicine	1	Medical Doctors
2212240020300	CZE SVK Cancerologist	1	Medical Doctors
2212250020300	CZE SVK Orthopeadist	1	Medical Doctors
2212260000000	Plastic surgeon	1	Medical Doctors
2212270020300	CZE SVK Pneumologist	1	Medical Doctors
2212280020300	CZE SVK General practitioner for children (pediatrist)	1	Medical Doctors
2212290020300	CZE SVK General practitioner for adults	1	Medical Doctors
2212300203000	CZE SVK Reumatologist	1	Medical Doctors
2212310020300	CZE SVK Sexuologist	1	Medical Doctors
2212320000000	Dentist, dentist surgeon	6	Dentists
2212340020300	CZE SVK Othorynolaryngologist	1	Medical Doctors
2212350000000	Radiologist	1	Medical Doctors
2212360020300	CZE SVK Diabetologist	1	Medical Doctors
2212370020300	CZE SVK Endocrynologist	1	Medical Doctors
2212380020300	CZE SVK Balneologist	1	Medical Doctors
2212990000000	Medical practitioner, all other specialists	1	Medical Doctors
2212990127600	DEU Medical practitioner, all other specialists Chefarzt	1	Medical Doctors
2212990227600	DEU Medical practitioner, all other specialists Oberarzt	1	Medical Doctors
2221020000000	Charge nurse	2	Nursing & Midwifery Professionals
2221020127600	DEU Charge nurse	2	Nursing & Midwifery Professionals
2221030000000	Children's nurse	2	Nursing & Midwifery Professionals
2221050000000	District nurse	2	Nursing & Midwifery Professionals
2221060000000	Hospital nurse	2	Nursing & Midwifery Professionals
2221060127600	DEU Hospital nurse	2	Nursing & Midwifery Professionals
2221070000000	Intensive care, recovery nurse	2	Nursing & Midwifery Professionals
2221090000000	Psychiatric nurse	2	Nursing & Midwifery Professionals
2221110000000	Surgical nurse	2	Nursing & Midwifery Professionals
2221990000000	Nurse, all other	2	Nursing & Midwifery Professionals
2222010000000	Professional midwife	2	Nursing & Midwifery Professionals
2261010000000	Dentist	6	Dentists
2262010000000	Pharmacist in hospital or factory	7	Pharmacists
2262020000000	Retail pharmacist	7	Pharmacists
2262030000000	Pharmacologist	7	Pharmacists
2262040000000	Toxicologist	1	Medical Doctors
2263010000000	Occupational health or safety officer	8	Environm. and Occup. Health and Hyg. Prof.
2264010000000	Physiotherapist	9	Physiotherapists
2264020000000	Remedial gymnast	9	Physiotherapists
2264030000000	Respiratory therapist	9	Physiotherapists
2264040000000	Occupational therapist	9	Physiotherapists
2264050000000	Psychomotor therapist	9	Physiotherapists
2264060000000	Chiropractor	15	Other Health Associate Professionals
2265010000000	Dietician	11	Other Health Professionals
2265030000000	Nutrition information officer	11	Other Health Professionals
2266010000000	Audiologist	11	Other Health Professionals
2266010127600	DEU Audiologist	11	Other Health Professionals
2266020000000	Speech therapist	11	Other Health Professionals
2269010000000	Therapist or health professional, all other	11	Other Health Professionals
2269020000000	Foot therapist, podiatrist	11	Other Health Professionals
2269040000000	Recreational therapist	11	Other Health Professionals
2269120000000	Occupational therapist	11	Other Health Professionals
2310050000000	Post-secondary education teacher health sciences	17	Health Researchers & Educators
2310190000000	University lecturer health sciences	17	Health Researchers & Educators
2310330000000	University professor health sciences	17	Health Researchers & Educators
2310470000000	Researcher health sciences	17	Health Researchers & Educators
2310550000000	Researcher psychology, pedagogic subjects	17	Health Researchers & Educators
2310560000000	Researcher social work, other social sciences	17	Health Researchers & Educators
2310610000000	PhD student health sciences	17	Health Researchers & Educators
2320070000000	Vocational education teacher health and welfare subjects	17	Health Researchers & Educators
2330070000000	Secondary education teacher health and welfare subjects	17	Health Researchers & Educators
2423050000000	Personnel officer	19	Health Care Administration & Operations
2423050127600	DEU Personnel officer Personalfachkaufmann	19	Health Care Administration & Operations
2423050227600	DEU Personnel officer Personalsachbearbeiter	19	Health Care Administration & Operations
2431020000000	Marketing professional	19	Health Care Administration & Operations
2432010000000	Public relations officer	19	Health Care Administration & Operations
2632010000000	Sociologist, anthropologist or related professional	17	Health Researchers & Educators
2632030000000	Epidemiologist	17	Health Researchers & Educators
2632990000000	Social scientist, all other	17	Health Researchers & Educators
2634010000000	Psychologist	11	Other Health Professionals
2635030000000	Mental health or abuse counsellor	11	Other Health Professionals
2635180000000	Addictions counsellor	11	Other Health Professionals
2635990000000	Social work or counselling professional, all other	11	Other Health Professionals
3133030000000	Pharmaceutical process controller	12	Medical and Pharmaceutical Technicians
3139130000000	First line supervisor process controllers industrial production, manufacture, metal	12	Medical and Pharmaceutical Technicians
3141010000000	Laboratory technician biology, biotechnology	12	Medical and Pharmaceutical Technicians
3211010000000	Medical radiation therapist	12	Medical and Pharmaceutical Technicians
3211020000000	Electrocardiograph equipment operator	12	Medical and Pharmaceutical Technicians
3211030000000	Electroencephalograph equipment operator	12	Medical and Pharmaceutical Technicians
3211060000000	Surgery assistant	15	Other Health Associate Professionals
3211070000000	Sonographer	12	Medical and Pharmaceutical Technicians
3211080000000	X-ray assistant	12	Medical and Pharmaceutical Technicians
3211190000000	Nuclear medicine technologist	12	Medical and Pharmaceutical Technicians
3212010000000	Medical laboratory technician	12	Medical and Pharmaceutical Technicians
3212020000000	Pathology laboratory technician	12	Medical and Pharmaceutical Technicians
3212040000000	Ophthalmic laboratory technician	12	Medical and Pharmaceutical Technicians
3213010000000	Pharmacology laboratory technician	12	Medical and Pharmaceutical Technicians
3213020000000	Pharmaceutical technician	12	Medical and Pharmaceutical Technicians
3213050000000	Pharmacy assistant (skilled)	12	Medical and Pharmaceutical Technicians
3214010000000	Medical prosthetic technician	12	Medical and Pharmaceutical Technicians
3214020000000	Dental prosthesis technician	12	Medical and Pharmaceutical Technicians
3221010000000	Nursing associate professional	13	Nurses & Midwifery Associate Professionals
3221010127600	DEU Nursing associate professional	13	Nurses & Midwifery Associate Professionals
3221020000000	Ambulance paramedic	15	Other Health Associate Professionals
3221030000000	Company nurse	13	Nurses & Midwifery Associate Professionals
3221040000000	Private nurse	13	Nurses & Midwifery Associate Professionals
3221050000000	School nurse	13	Nurses & Midwifery Associate Professionals
3221060000000	Emergency medical technician	15	Other Health Associate Professionals
3222010000000	Assistant midwife	13	Nurses & Midwifery Associate Professionals
3251010000000	Dental assistant	15	Other Health Associate Professionals
3251010127600	DEU Dental assistant	15	Other Health Associate Professionals
3251020000000	Dental hygienist	15	Other Health Associate Professionals
3252010000000	Medical records or health information technician	20	Health Informatics Technicians.
3253010000000	Community health worker	14	Community Health Workers
3253010127600	DEU Community health worker	14	Community Health Workers
3254010000000	Dispensing optician	15	Other Health Associate Professionals
3255010000000	Physiotherapy assistant	15	Other Health Associate Professionals
3255030000000	Massage therapist	15	Other Health Associate Professionals
3255040000000	Masseur	15	Other Health Associate Professionals
3255050000000	Foot therapist, podiatrist	15	Other Health Associate Professionals
3256010000000	Medical assistant	15	Other Health Associate Professionals
3256010127600	DEU Medical assistant Arzthelfer	15	Other Health Associate Professionals
3256010227600	DEU Medical assistant Kieferorthopadische Fachhelfer	15	Other Health Associate Professionals
3256010327600	DEU Medical assistant Kieferorthopadische Helfer	15	Other Health Associate Professionals
3256020000000	Anaesthetist assistant	15	Other Health Associate Professionals
3256030000000	Physician assistant	15	Other Health Associate Professionals
3256030127600	DEU Physician assistant	15	Other Health Associate Professionals
3257020000000	Occupational health or safety inspector	8	Environm. and Occup. Health and Hyg. Prof.
3257180000000	Sanitary inspector	8	Environm. and Occup. Health and Hyg. Prof.
3259060000000	Recreational therapist	15	Other Health Associate Professionals
3259070000000	Creative therapist	15	Other Health Associate Professionals
3259180000000	Osteopath	15	Other Health Associate Professionals
3259190000000	Chiropractor	15	Other Health Associate Professionals
3259990000000	Health associate professional, all other	15	Other Health Associate Professionals
3313040000000	Bookkeeper	19	Health Care Administration & Operations
3314050000000	Clinical research associate	17	Health Researchers & Educators
3322000000000	Sales representative	19	Health Care Administration & Operations
3323000000000	Buyer	19	Health Care Administration & Operations
3323020000000	Buyer chemical products	19	Health Care Administration & Operations
3323030000000	Buyer computer equipment	19	Health Care Administration & Operations
3323050000000	Buyer pharmaceutical products	19	Health Care Administration & Operations
3323060000000	Buyer technical products	19	Health Care Administration & Operations
3323990000000	Buyer, all other products or services	19	Health Care Administration & Operations
3343010000000	Administrative secretary	19	Health Care Administration & Operations
3343020000000	Director's secretary	19	Health Care Administration & Operations
3343030000000	Office manager	19	Health Care Administration & Operations
3344010000000	Medical secretary or receptionist	19	Health Care Administration & Operations
3344010127600	DEU Medical secretary or receptionist	19	Health Care Administration & Operations
3412140000000	Community service worker	14	Community Health Workers
3412990000000	Social work associate professional, all other	15	Other Health Associate Professionals
3423080000000	Recreation program worker for elderly	15	Other Health Associate Professionals
3423090000000	Recreation program worker for handicapped	15	Other Health Associate Professionals
3512010000000	IT user support technician	20	Health Informatics Technicians.
4110050000000	Office clerk	19	Health Care Administration & Operations
4120030000000	Project secretary	19	Health Care Administration & Operations
4120040000000	Team or department secretary	19	Health Care Administration & Operations
4120060000000	Secretary	19	Health Care Administration & Operations
4120990000000	Secretary, all other	19	Health Care Administration & Operations
4226010000000	Receptionist	19	Health Care Administration & Operations
4226030000000	Receptionist, telephonist	19	Health Care Administration & Operations
4321030000000	Logistics worker	19	Health Care Administration & Operations
4416020000000	Staff scheduling clerk	19	Health Care Administration & Operations
5120090000000	Catering worker	19	Health Care Administration & Operations
5169050000000	Residential warden	16	Personal Care Workers in Health Services
5321020000000	Nursing aide (clinic or hospital)	13	Nurses & Midwifery Associate Professionals
5321040000000	Maternity carer	16	Personal Care Workers in Health Services
5321130000000	Elderly aide	16	Personal Care Workers in Health Services
5321140000000	Handicapped aide	16	Personal Care Workers in Health Services
5321150000000	Pharmacy aide	16	Personal Care Workers in Health Services
5321160000000	Psychiatric aide	16	Personal Care Workers in Health Services
5322010000000	Home care aide	16	Personal Care Workers in Health Services
5322020000000	Maternity carer	16	Personal Care Workers in Health Services
5329010000000	First line supervisor personal care workers	16	Personal Care Workers in Health Services
5329030000000	First line supervisor personal care workers in an institution	16	Personal Care Workers in Health Services
5329040000000	Personal carer in an institution for the elderly	16	Personal Care Workers in Health Services
5329040127600	DEU Personal carer in an institution for the elderly	16	Personal Care Workers in Health Services
5329050000000	Personal carer in an institution	16	Personal Care Workers in Health Services
5329150127600	Hospital orderly	16	Personal Care Workers in Health Services
5329160127600	First-aid attendant	16	Personal Care Workers in Health Services
5329990000000	Personal carer in an institution	16	Personal Care Workers in Health Services
8322040000000	Ambulance driver (non paramedic)	15	Other Health Associate Professionals
8322040127600	DEU Ambulance driver (non paramedic)	15	Other Health Associate Professionals
9112010000000	Cleaner in offices, schools or other establishments	19	Health Care Administration & Operations
9129040000000	Cleaner laboratory equipment	19	Health Care Administration & Operations
